# Supplementary material for: Liver Antioxidant Capacity and Steatosis in Laying Hens Exposed to Various Quantities of Lupin (Lupinus angustifolius) Seeds in the Diet
Source: MDPI journal article supplement (doi:10.3390/antiox13020251), 2024-02-19
Supplement: s1 [file s1]

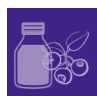

Table S1. Comparison of superoxide dismutase (SOD) and catalase (CAT) levels for experimental groups T00–T25 using one-way ANOVA and Tukey's test (small letters – a) and activity of the mentioned enzymes between group T00 on 24 weeks of age and groups T0-T25 on 29 weeks of age (33 day of the experiment) - capital letters (A, B), in the serum of laying hens. The results are presented using means and standard deviation ( $\pm$ SD) for  $p \leq 0.05$ . Statistical significance was indicated by: significant differences \*\* for  $p \leq 0.001$ ; \*\*\* for  $p \leq 0.0001$ ; N – number of hens.

|                                                        | Serum                        |                            |
|--------------------------------------------------------|------------------------------|----------------------------|
|                                                        | SOD [U/mL]                   | Catalase [ $\mu$ M/min/mL] |
| 24 weeks of age (N = 30)                               | T00 0.2 $\pm$ 0.02A          | 39.94 $\pm$ 5.34A          |
|                                                        | T0 0.19 $\pm$ 0.02Aa***      | 74.69 $\pm$ 3.14 B***a***  |
| 33 day of experiment, i.e. 29 weeks of age<br>(N = 30) | T10 0.14 $\pm$ 0.02B***a***  | 140.85 $\pm$ 9.68 B***a*** |
|                                                        | T15 0.11 $\pm$ 0.02 B***a*** | 46.08 $\pm$ 2.19 B*a***    |
|                                                        | T20 0.15 $\pm$ 0.03 B***a*** | 57.58 $\pm$ 3.53 B***a***  |
|                                                        | T25 0.12 $\pm$ 0.02 B***a**  | 58.9 $\pm$ 1.91 B***a**    |
